# Supplementary material
Source: Springer Nature journal article supplement (https://www.springermedizin.de/resource/supplementary/13058_2014_3405_MOESM2_ESM.pdf/9704116)
Supplement: MOESM2 [file 9704116]

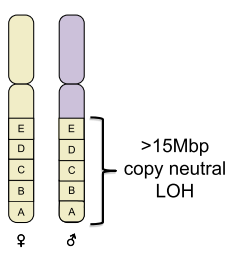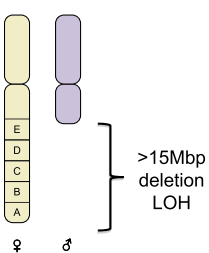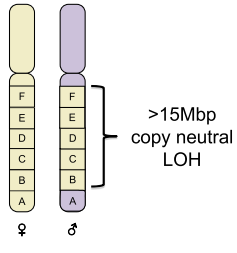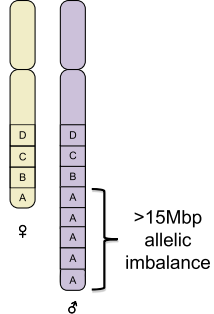

| HRD | NtAi | LST |
|-----|------|-----|
| 1   | 1    | 1   |

| HRD | NtAi | LST |
|-----|------|-----|
| 1   | 1    | 1   |

| HRD | NtAi | LST |
|-----|------|-----|
| 1   | 0    | 1   |

| HRD | NtAi | LST |
|-----|------|-----|
| 0   | 1    | 1   |

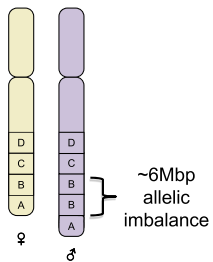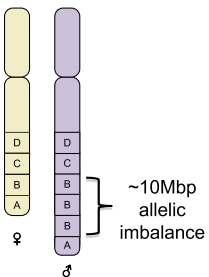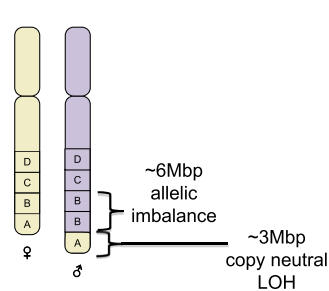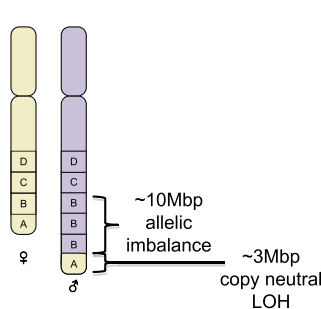

| HRD | NtAi | LST |
|-----|------|-----|
| 0   | 0    | 0   |

| HRD | NtAi | LST |
|-----|------|-----|
| 0   | 0    | 1   |

| HRD | NtAi | LST |
|-----|------|-----|
| 0   | 1    | 0   |

| HRD | NtAi | LST |
|-----|------|-----|
| 0   | 1    | 1   |
